# Supplementary material for: Formamide significantly enhances the efficiency of chemical adenylation of RNA sequencing ligation adaptors
Source: PubMed Central journal article supplement — RNA. 2023 Jul;29(7):1077–83. doi: 10.1261/rna.079521.122 (PMC10275264; doi:10.1261/rna.079521.122), 2023-07
Supplement: supp_079521.122_Supplemental_Figure1.pdf [file supp_079521.122_Supplemental_Figure1.pdf]

| DNA Oligonucleotide Name | DNA Oligonucleotide Sequence                                                            | Predicted $\Delta G$ (kcal/mol) |
|--------------------------|-----------------------------------------------------------------------------------------|---------------------------------|
| ODN1                     | /5Phos/NNNGTCNNNTAGNNNCGTTCTGGAATTCTCGGG TGCCAAGG/ddC/                                  | -0.68                           |
| 26-nt DNA                | /5Phos/AA GAG ATT AAA CCT CGG ACC CTG CAC                                               | 1.01                            |
| 35-nt DNA 1              | /5Phos/AA GAG ATT AAT GAG TCG GAG ACA CGC AGG GCT TAA                                   | -0.76                           |
| 35-nt DNA 2              | /5Phos/CA GAC TAG CAT GAG TCG GAG ACA CGC AGG GCT TAA                                   | -0.76                           |
| 36-nt DNA                | /5Phos/TCC ATA TCC AAT GAG TCG GAG ACA CGC AGG GCT TAA                                  | -0.76                           |
| 43-nt DNA 1              | /5Phos/AA GAG ATT AAA TTG TAG GAC TAC AGT CAC CTC GGA CCC TGC AC                        | 0.65                            |
| 43-nt DNA 2              | /5Phos/AA GAG ATT AAA TTG TAG GAC TAC AGT CAG GAG CCA CCC TGC AC                        | 0.16                            |
| 60-nt DNA 1              | /5Phos/TA AAG ATT CAA CCA CCG ACC CAG CAC GAT CCT TGG CAC CCG AGA ATT CCA CCT AGT TTA A | 0.75                            |
| 60-nt DNA 2              | /5Phos/AA GAG ATT AAA CCA CCG ACC CAG CAC GAT CCT TGG CAC CCG AGA ATT CCA TAT ATC AGT A | 0.75                            |
| ORN1                     | rArGrU rArUrG rGrGrC rArUrU rUrCrG rCrArG rCrCrU rArCrC rGrUrG rGrUrG                   | -8.72                           |
