# Supplementary figures and images for: Formamide significantly enhances the efficiency of chemical adenylation of RNA sequencing ligation adaptors
Source: PubMed Central journal article supplement — RNA. 2023 Jul;29(7):1077–83. doi: 10.1261/rna.079521.122 (PMC10275264; doi:10.1261/rna.079521.122), 2023-07

**A**

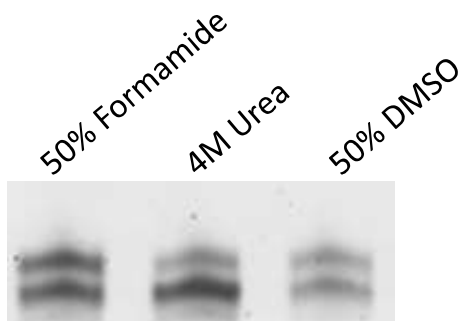

**B**

Water

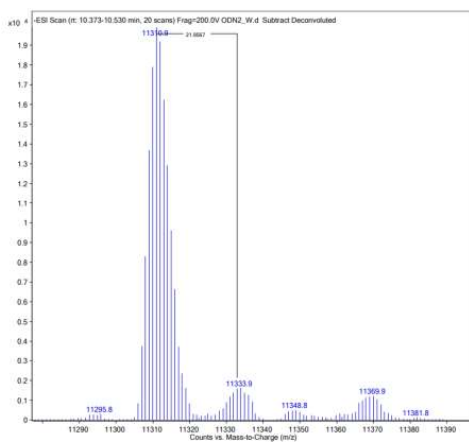

Pure Formamide

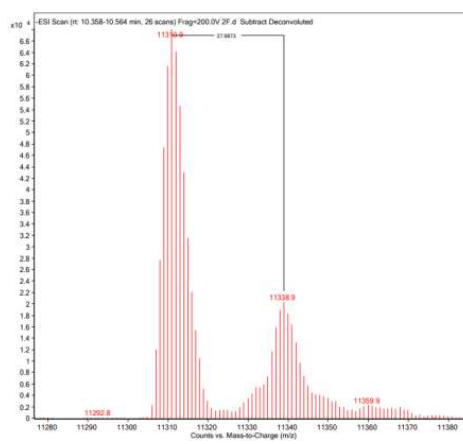

95% Formamide

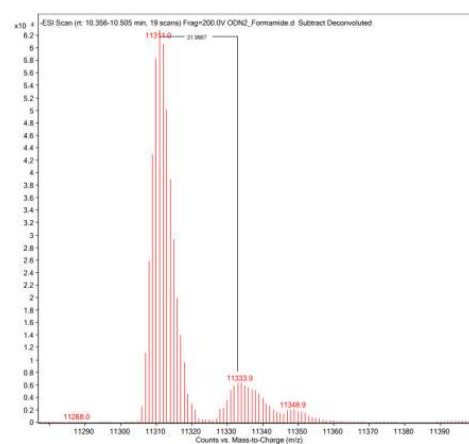

Supplement: supp_079521.122_Supplemental_Figure2.pdf [file supp_079521.122_Supplemental_Figure2.pdf]

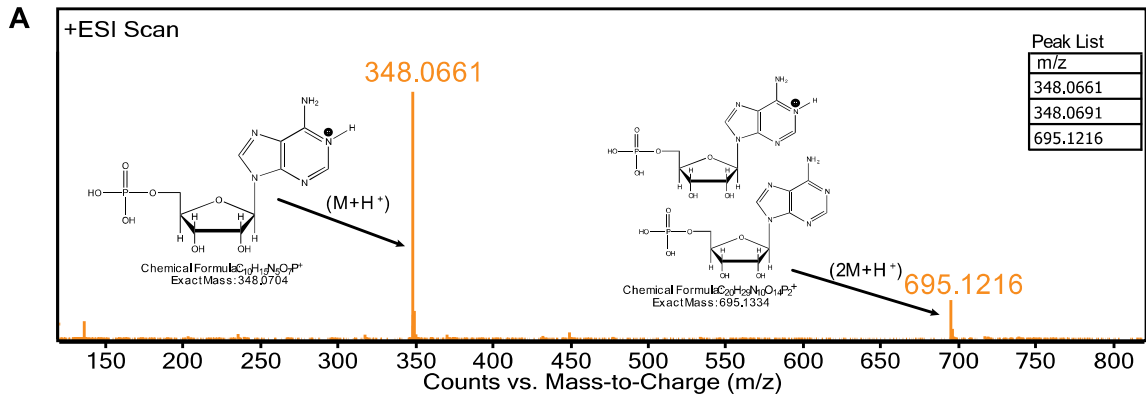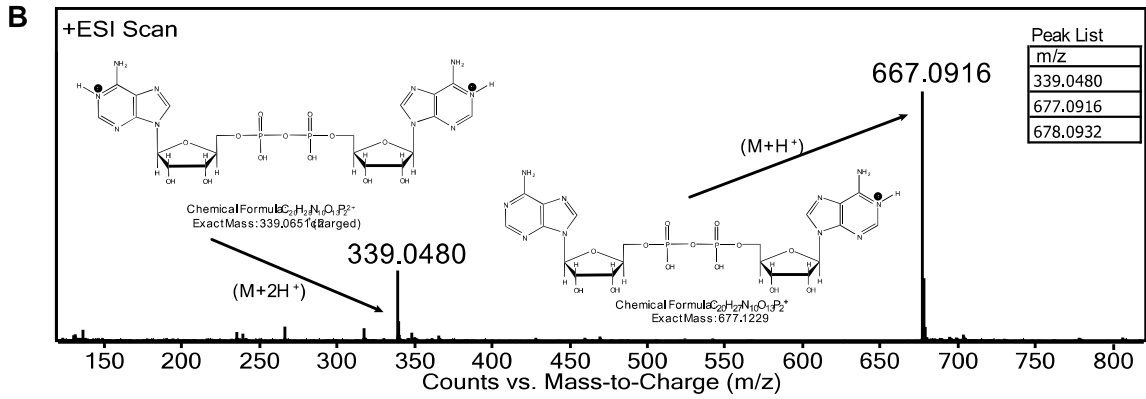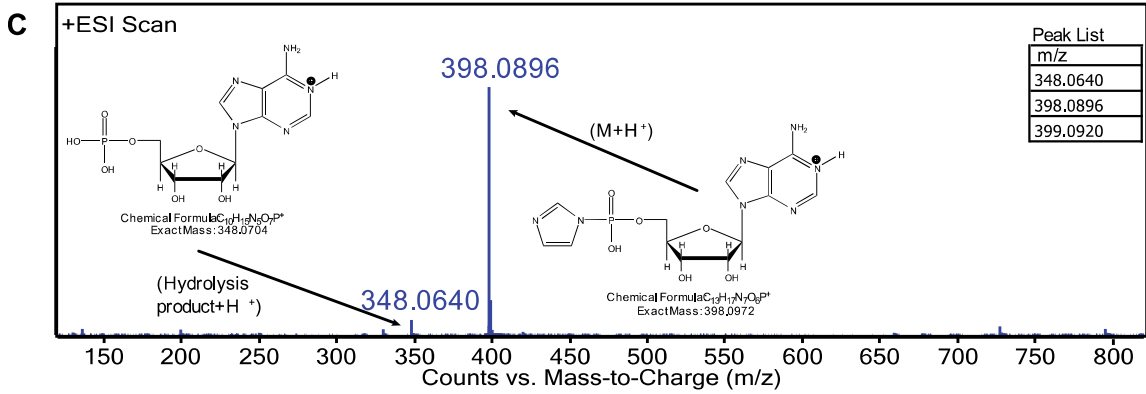

Supplement: supp_079521.122_Supplemental_Figure3.pdf [file supp_079521.122_Supplemental_Figure3.pdf]

31P NMR

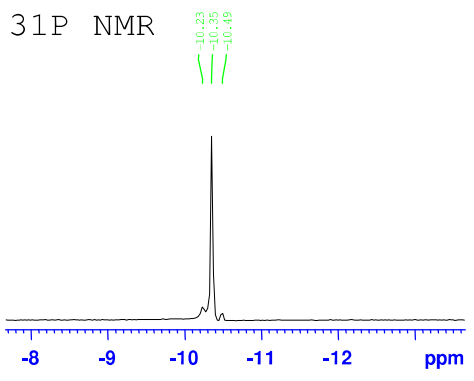

Chemical Formula:  $C_{13}H_{15}N_7NaO_6P$   
Molecular Weight: 419.27

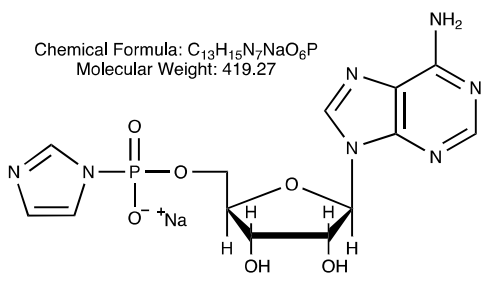

1H NMR

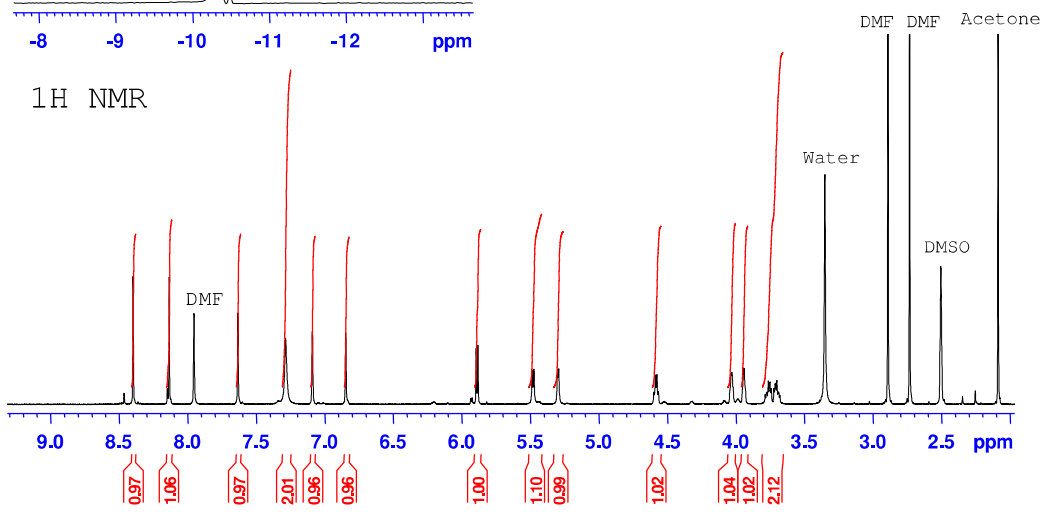

Supplement: supp_079521.122_Supplemental_Figure4.pdf [file supp_079521.122_Supplemental_Figure4.pdf]
